# Supplementary material for: Inter-Segmental Coordination Pattern in Patients with Anterior Cruciate Ligament Deficiency during a Single-Step Descent
Source: PLoS One. 2016 Feb 22;11(2):e0149837. doi: 10.1371/journal.pone.0149837 (PMC4762765; doi:10.1371/journal.pone.0149837)
Supplement: S1 Data — (XLSX) [file pone.0149837.s001.xlsx]

## Sheet: Sheet1
0.299057	0.348975	Coordination Pattern of the Supporting Foot-Shank ()					(ACLD/Healthy)
0.30676	0.360424
0.315545	0.372504
0.324719	0.385284
0.334183	0.39885
0.343985	0.413306
0.354205	0.428777
0.365041	0.445397
0.376628	0.463382
0.389029	0.483125
0.402243	0.505374
0.41631	0.531881
0.431362	0.56808
0.447551	0.63951
0.465127	0.678988
0.484379	0.651601
0.505721	0.66293
0.529791	0.686929
0.55798	0.718323
0.5944	0.756472
0.655535	0.802816
0.741101	0.862001
0.708996	0.951054
0.719283	1.0969
0.747737	1.15291
0.786401	1.24768
0.834702	1.31684
0.895993	1.52308
0.982708	1.9724
1.14381	2.27754
1.26219	2.69749
1.29097	2.97054
1.35702	3.20159
1.49658	3.64441
1.72535	3.92361
2.16984	5.15
3.1519	6.35905
3.84395	7.69043
4.68943	12.5354
5.53085	17.5248
6.5473	22.2473
7.88929	25.1999
9.38164	28.9116
13.349	32.2665
18.788	36.1086
25.1638	41.3962
31.8797	48.7649
37.6841	55.8647
43.8602	65.0867
52.119	75.1873
59.4776	84.7446
64.6969	91.4799
72.9432	95.9902
82.981	102.036
91.7982	110.897
99.5925	118.725
106.952	127.118
116.436	136.125
125.303	142.72
132.24	147.581
136.53	149.392
139.306	150.924
139.444	150.483
137.533	150.576
135.033	149.248
129.603	143.758
122.779	136.168
114.826	129.254
106.111	122.567
96.647	115.846
86.9964	108.383
79.2857	99.7003
72.766	92.5597
66.0561	82.6469
58.0447	71.4509
50.1816	60.0111
42.9874	49.6022
37.6037	38.3458
33.0147	28.1004
27.5719	20.448
20.0833	13.821
13.746	8.78242
9.56706	5.51909
6.35783	4.1449
4.51913	3.36371
3.37965	2.41632
2.49985	1.83921
1.88351	1.36769
1.46242	1.03033
1.04816	0.829403
0.883767	0.687575
0.682606	0.584388
0.550875	0.508161
0.466858	0.452814
0.405076	0.417147
0.35425	0.403381
0.315314	0.433616
0.289214	0.56952
0.280732	0.535011
0.277654	0.526569

## Sheet: Sheet2
113.187	168.902	Coordination Pattern of the Supporting Shank-Thigh (ACLD/Healthy)
115.028	169.111
116.315	169.342
117.849	169.52
119.2	169.517
119.921	169.475
120.495	169.562
120.782	169.466
120.871	169.22
121.454	169.261
122.859	169.42
125.059	169.49
127.116	169.487
128.477	169.269
129.577	168.662
130.501	167.951
131.757	167.7
133.288	167.557
135.127	167.37
137.171	167.851
139.196	168.263
141.23	168.394
143.534	168.534
145.503	168.513
147.053	168.522
148.811	168.674
150.448	168.77
152.07	168.448
153.589	167.426
155.45	166.298
157.32	165.766
159.095	166.526
159.853	166.505
160.217	166.216
160.658	166.398
161.304	165.537
162.303	164.569
162.981	163.233
162.379	160.276
162.081	157.715
161.334	153.862
160.34	151.174
158.814	148.176
155.544	145.841
151.581	142.999
146.002	138.016
139.657	129.99
134.707	122.629
129.478	113.781
122.772	103.651
117.19	93.7831
112.965	86.4213
105.192	80.912
95.7125	73.9206
86.3343	65.7157
77.8846	58.8648
69.8839	49.7161
59.5352	39.4396
48.6503	31.4783
38.8865	25.7259
31.7324	21.2031
25.0517	16.7774
20.4489	13.0937
17.4038	9.18397
14.1578	6.39209
11.6606	5.78874
9.12635	5.05537
7.17496	4.52989
6.13668	4.28686
5.39892	4.15582
5.02413	4.3237
5.4144	4.6168
5.985	5.05227
6.49474	5.69593
7.10315	6.43436
7.71606	7.65178
8.77444	9.06848
10.72	10.9745
13.3612	13.5782
17.0612	17.9716
23.2647	23.3855
28.7321	28.4722
34.7483	34.1363
42.3381	41.0064
51.5004	49.694
60.3371	61.2809
69.9652	73.2211
81.9802	87.1816
93.6497	101.768
104.776	115.456
115.908	128.199
124.728	139.28
132.529	148.749
141.102	156.146
148.969	160.901
155.298	164.537
159.786	167.27
163.666	169.459
166.856	171.409
167.046	172.106

## Sheet: Sheet3
0.0718659	0.0941226	Coordination Variability of the Supporting Foot-Shank (ACLD/Healthy)
0.0736876	0.0989429
0.0752707	0.104343
0.0777364	0.11041
0.0806299	0.117285
0.0835815	0.125179
0.0868712	0.134412
0.0908816	0.145467
0.0953194	0.159156
0.100172	0.176936
0.105763	0.201794
0.112295	0.241119
0.119928	0.319136
0.128955	0.568138
0.139876	1.17879
0.153494	1.28163
0.171175	1.31178
0.195531	1.33792
0.232476	1.36806
0.299816	1.40676
0.477377	1.46132
1.05981	1.55043
1.27153	1.74951
1.31405	2.42809
1.34548	2.94282
1.38078	3.65954
1.42697	3.90891
1.4965	4.29583
1.63241	5.66861
2.09234	7.11928
2.6871	8.44044
3.06757	9.80439
3.19926	11.2831
3.34849	12.6986
3.59904	13.857
4.20656	15.2915
6.49881	17.6847
9.56185	19.6436
12.1258	22.2389
13.9999	24.9414
15.9584	27.6674
18.4266	30.6877
20.1558	33.6094
22.6109	36.3372
26.2461	38.2303
28.8056	38.4061
32.519	39.6163
35.5971	41.0292
37.5356	42.6929
40.3229	43.2796
43.1547	43.1327
44.7717	43.1139
45.0979	43.6293
45.5513	44.9846
45.8853	45.4795
43.1567	45.2419
41.4948	44.5773
40.1577	43.9389
39.9407	43.6916
38.4728	41.0038
38.6293	39.0947
39.6313	36.8695
40.7169	36.1571
40.716	35.168
40.4304	33.9818
40.3085	33.9245
40.3158	33.8154
39.1872	33.6251
38.1931	33.0782
35.8827	34.1445
34.3808	35.1099
34.1589	35.0064
33.1816	35.8272
30.3368	36.6924
28.1613	37.0631
26.6998	38.1254
26.7979	36.7384
25.5796	35.6035
23.526	31.6246
21.0402	28.3551
17.9582	24.6639
15.8372	17.6126
14.0588	13.1567
12.7601	10.5424
10.8667	7.68507
9.16582	4.60362
7.55842	2.85766
5.54559	1.4217
3.45821	0.877891
2.08724	0.645719
1.51655	0.508594
0.727074	0.4184
0.474496	0.362451
0.35874	0.333802
0.286621	0.332159
0.241204	0.375148
0.211217	0.542944
0.194561	1.24259
0.186465	1.83614
0.174169	2.10297

## Sheet: Sheet4
34.2996	20.7645	Coordination Variability of the Supporting Shank-Thigh (ACLD/Healthy)
33.7661	19.8603
32.9865	19.3283
32.5668	19.0746
32.4863	18.8315
32.4878	18.4088
32.4477	17.918
32.1149	17.791
31.6021	17.8162
30.9211	17.3634
30.3554	16.6077
29.9152	16.1656
29.735	15.6502
29.3182	15.6929
29.4159	16.8285
29.656	17.5409
30.1411	18.0421
30.3938	18.1746
30.3421	18.1345
30.2845	18.2561
30.185	18.4391
30.5664	18.8502
30.7587	19.1757
30.6715	19.766
30.4037	20.313
30.2896	21.3968
30.1417	21.7874
29.6799	21.9363
29.3401	22.1441
29.1827	22.3354
28.7283	23.0794
28.1962	24.1759
27.8897	24.432
27.6253	24.5976
27.3284	25.0451
26.7433	25.5605
26.2607	26.7617
26.5335	27.4645
27.3483	28.9558
27.7151	30.6053
28.5015	32.1032
30.0005	34.1496
31.1155	35.6274
31.7176	37.7649
33.4159	40.0579
34.8389	40.8643
36.4109	42.4335
38.5324	44.0502
39.477	45.4497
41.2879	46.6798
43.6876	46.963
44.3108	46.6762
44.5464	47.0313
45.9321	47.2756
46.7763	47.0421
45.2314	46.2543
43.5705	44.6701
42.6038	42.2506
41.6859	39.6637
39.0348	35.1655
35.5518	30.9035
32.7414	25.8695
29.708	22.889
25.6962	20.2188
21.6149	17.8087
18.5261	15.5589
17.1138	12.2699
16.7539	10.2211
16.269	8.26575
14.5396	7.89507
13.9699	7.98628
14.6073	9.20574
15.9693	10.4571
18.2086	11.8481
20.7955	13.5895
22.9162	16.3792
25.0789	19.0333
27.9102	22.0671
31.2949	26.0176
34.777	30.556
38.5685	35.1556
42.4897	39.2821
45.4433	42.7327
48.2827	47.0672
50.7653	50.6185
52.3081	53.3765
53.6467	54.099
54.8654	54.3075
55.1749	54.0965
53.6666	52.6937
51.3982	50.7312
49.3448	47.7874
45.9311	44.3446
42.0558	40.3402
38.4763	35.508
35.5527	29.7318
31.719	24.8549
26.476	20.6847
22.3349	16.6595
22.5989	13.685

## Sheet: Sheet5
29.6609	40.2768	Coordination Pattern of the Stepping Foot-Shank (ACLD/Healthy)
33.6056	43.7488
37.244	46.9493
38.9439	50.8429
41.715	53.4501
44.3457	55.4462
46.8942	58.6378
50.0298	60.661
55.1345	64.2197
58.4143	67.9632
61.4344	73.2422
63.9709	79.4664
66.7182	84.8328
69.3671	90.0473
70.673	93.084
73.2608	95.0129
78.8544	97.5976
83.3506	101.423
86.6915	105.506
89.0111	108.566
91.3794	111.071
92.8981	113.71
94.3636	114.914
95.7203	116.561
95.9342	117.917
96.5836	119.305
96.3852	118.965
94.8186	117.901
94.2301	116.144
94.0168	115.298
93.9672	115.734
93.0242	115.587
92.3167	111.883
90.5865	110.519
89.9107	110.319
90.6186	110.828
91.1291	112.251
91.1791	113.56
89.681	114.307
89.3791	114.675
90.2461	115.222
90.3031	117.564
90.8623	120.684
92.4126	123.599
93.8098	126.973
94.9518	129.073
97.4619	131.304
102.738	133.406
107.206	135.133
110.292	134.319
113.911	133.268
118.632	133.871
122.781	134.439
123.243	134.549
122.536	136.215
120.83	136.851
120.722	135.969
121.752	134.315
122.274	131.4
122.49	129.142
121.834	125.872
117.71	121.887
111.093	117.499
103.856	113.742
95.2611	108.173
88.932	100.457
83.0011	92.9217
78.7314	87.5556
76.3526	80.6106
75.7574	76.2487
76.6649	74.8697
78.7255	75.0357
81.4993	78.2777
83.6865	81.7096
86.606	85.6813
90.9672	89.8664
96.4778	94.4285
102.381	100.095
108.891	107.109
115.662	115.543
123.508	124.011
130.72	131.705
137.386	138.541
143.506	144.624
148.799	150.427
153.887	155.375
158.772	159.008
163.127	161.921
166.537	164.547
169.179	167.016
171.316	169.104
172.832	170.857
173.944	172.311
174.578	173.507
175.162	174.385
175.789	174.751
176.252	175.548
176.563	176.369
177.053	176.872
177.138	176.982

## Sheet: Sheet6
134.799	150.883	Coordination Pattern of the Stepping Shank-Thigh (ACLD/Healthy)
132.414	146.063
129.923	141.708
128.312	136.268
126.149	129.025
123.311	122.678
120.812	116.498
119.572	110.95
117.577	105.033
114.516	99.4429
110.057	92.759
105.056	85.7129
100.135	78.6501
94.7487	71.6942
89.2088	66.2206
82.5489	59.6248
74.4131	53.0721
66.5898	47.3324
59.7164	41.8226
53.1535	37.3312
48.6698	34.0911
45.0902	31.2745
43.198	30.4933
40.4909	28.6856
38.9142	28.1242
39.0312	27.5067
39.9682	28.8158
41.3858	30.6713
44.9124	31.1183
48.135	31.6118
52.8288	33.1034
56.8808	35.3711
58.5741	36.8659
62.1267	39.6625
66.231	42.9659
69.2114	48.3495
72.0079	54.2343
75.567	59.1485
79.3827	64.3539
84.0738	69.8799
91.4715	76.9323
96.9603	82.9441
102.279	88.8126
107.083	94.9148
113.159	102.243
119.478	109.181
124.385	115.633
128.834	119.421
132.865	123.481
138.782	127.436
144.603	129.362
147.105	131.201
147.646	131.93
149.605	133.389
153.156	134.27
156.618	134.281
160.505	134.599
163.846	135.586
166.446	136.354
167.858	138.539
167.919	139.644
166.552	139.186
164.333	138.589
160.422	137.523
156.658	136.772
152.951	136.528
148.484	135.246
142.791	131.721
136.473	127.412
130.205	122.564
123.495	117.516
116.787	111.83
110.098	105.215
103.879	98.9884
97.6874	92.8014
90.6339	86.8391
83.2359	81.3559
75.5778	74.7953
67.9531	67.9186
60.2668	60.0913
53.5923	52.9617
47.8021	46.5694
42.3774	40.5543
37.3746	34.7221
33.533	28.2624
29.8381	23.603
26.1448	19.9614
22.1662	16.9378
19.1314	14.2909
16.3811	12.544
13.5348	10.872
11.3524	8.99324
9.59354	7.4884
7.90917	6.02528
5.976	4.84331
4.95095	4.05516
4.40804	3.09872
3.7086	2.40439
3.19866	2.07453
3.01929	2.0103

## Sheet: Sheet7
37.9447	44.4814	Coordination Variability of the Stepping Foot-Shank (ACLD/Healthy)
40.0501	46.2104
41.841	47.8013
43.1961	49.4723
44.56	50.4361
46.6267	51.0625
47.261	51.6925
47.0136	52.7457
47.059	54.0371
48.2069	55.6558
49.8802	56.6835
50.6694	57.2502
50.6384	57.0718
51.153	56.644
51.6779	56.5213
51.8798	55.8359
52.8524	55.093
53.6237	54.2588
53.5953	53.1496
53.1123	52.1756
51.5971	50.7954
50.6749	48.6992
49.9627	47.0918
49.9631	46.4398
49.4176	46.0549
47.8248	45.6106
47.0698	44.824
47.1493	45.1375
46.9725	45.6809
46.7532	45.6107
45.7237	45.9154
44.4894	46.3457
43.1943	46.5681
42.1627	46.8121
41.9518	46.6193
41.4294	45.9347
40.2522	44.9122
39.4521	44.0262
38.0399	42.7939
36.9543	41.3609
36.9468	39.4991
36.7942	38.8083
36.4756	37.9037
35.8816	36.9557
34.4214	36.2937
33.6541	34.4588
32.3617	32.056
32.4757	29.6463
32.8691	28.4045
32.6148	28.4662
32.4648	29.7581
31.8935	29.9787
33.1297	29.7466
35.212	29.3911
35.628	28.9435
34.6744	28.4861
34.8714	27.4287
35.3839	27.4175
35.6773	28.0701
36.2135	28.4359
37.3828	29.224
38.4191	30.5567
39.2738	32.9193
40.2858	35.8485
41.9102	37.4894
43.4351	39.7969
45.7301	42.2939
46.1446	43.628
45.44	42.5927
44.5834	41.7167
41.899	40.5764
38.9065	39.6931
35.94	38.7298
33.3587	38.7984
31.2176	39.3694
30.5056	39.5861
29.6981	38.7196
30.0382	37.3944
29.7935	35.9138
28.7348	35.4061
27.311	34.3538
26.1632	32.4863
24.7966	30.3338
23.5537	28.3143
22.2758	26.5416
20.6133	24.6509
19.1591	22.4624
17.6991	19.882
16.1687	17.3364
14.6762	14.9605
12.7603	13.0907
11.633	11.5157
10.8332	10.2819
10.2802	9.10598
9.37865	8.09337
8.36475	7.37268
7.44912	6.7505
7.10077	6.19429
7.09138	5.87259
7.03329	5.03813

## Sheet: Sheet8
32.9786	37.7998	Coordination Variability of the Stepping Shank-Thigh (ACLD/Healthy)
33.3089	39.136
34.3658	40.9476
35.7347	43.5343
36.3552	45.9328
37.1781	47.54
38.1597	48.8029
39.0829	50.3629
40.4083	51.6011
42.3296	52.7091
44.1396	53.459
45.9738	53.67
47.0911	53.1213
47.9109	52.0987
48.4458	51.4329
48.6251	50.6669
49.2181	49.3393
50.4225	47.6351
50.0922	45.3069
48.7561	43.4882
46.8728	41.4489
45.5378	38.612
44.0586	35.7401
42.0421	33.1678
40.3112	31.6561
39.3367	29.8614
37.8582	28.2369
36.2877	27.8174
35.9179	28.0404
36.5954	28.1171
37.6406	28.2826
38.7201	30.7972
39.015	31.9033
38.3331	34.27
37.514	35.7554
37.4101	37.4902
37.2061	39.6586
37.6342	40.7879
40.2311	40.6364
41.1344	40.8799
42.5526	40.2829
43.6066	38.171
43.366	36.9764
41.2669	37.0086
39.4501	36.4483
38.7569	36.5327
38.7606	36.5547
38.1941	36.0327
36.8864	33.1811
34.5124	30.3395
33.2858	28.6371
32.374	28.5838
30.6977	27.9281
29.6877	26.0631
28.5753	24.5784
26.8855	22.2082
24.87	20.9934
24.0711	20.4631
23.2575	20.1725
22.8061	21.1049
22.81	22.1303
23.1619	22.9698
23.9211	23.7514
24.6486	25.1013
25.6185	27.4342
27.4537	30.5401
29.0328	34.4921
30.8139	37.2532
32.6185	38.5555
33.4509	39.3806
33.4576	39.7321
33.8278	40.5541
34.4965	41.7011
35.1964	42.6369
35.8344	42.5504
35.8873	42.4541
35.6143	41.3821
35.9577	39.0655
36.3182	37.4667
35.8271	36.3909
34.5875	35.1383
34.1496	33.289
33.8841	31.2026
33.5446	29.2701
32.9127	27.8071
32.4204	25.9577
31.9049	23.7375
30.6545	21.104
28.9619	18.2968
26.6639	16.0378
25.2426	14.4408
24.1912	13.11
22.9305	11.8482
21.2942	10.4898
19.3112	9.50074
17.7209	8.25209
15.4784	6.63238
12.9749	5.76533
11.1666	5.26923
10.5482	4.87264
